# Supplementary material for: Geothermal Gases Shape the Microbial Community of the Volcanic Soil of Pantelleria, Italy
Source: PubMed Central journal article supplement (PMC7646524; doi:10.1128/msystems.00517-20), 2020-11-03
Supplement: mSystems.00517-20-sf002.pdf [file mSystems.00517-20-sf002.pdf]

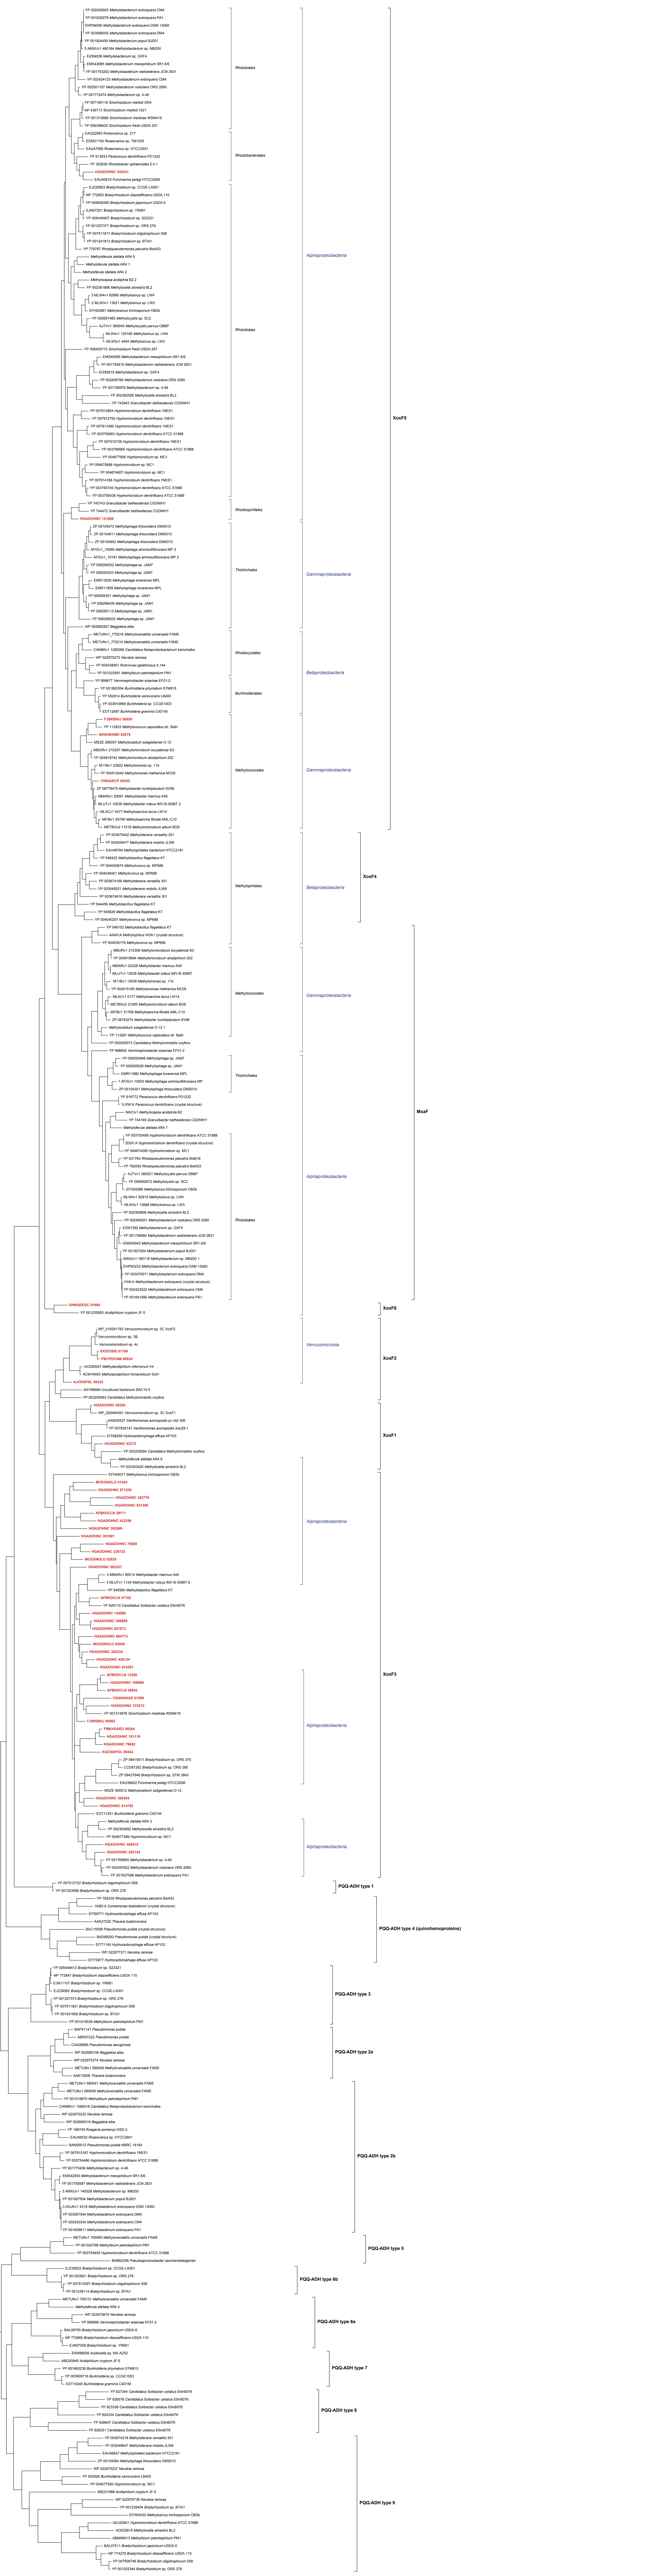

Supplementary Figure S2
