# Supplementary material for: Geothermal Gases Shape the Microbial Community of the Volcanic Soil of Pantelleria, Italy
Source: PubMed Central journal article supplement (PMC7646524; doi:10.1128/msystems.00517-20), 2020-11-03
Supplement: mSystems.00517-20-st001.pdf [file mSystems.00517-20-st001.pdf]

**Table S1.** Relative abundance of the microbial community of site FAV2 in Pantelleria Island based on 16S rRNA gene sequences retrieved from the metagenome. Values are expressed in % and results of both DNA extraction method (CTAB and Power Soil kit) are shown separately.

|                         | 1-10 cm |        | 10-15 cm |        | 15-20 cm |        |
|-------------------------|---------|--------|----------|--------|----------|--------|
|                         | CTAB    | PS kit | CTAB     | PS kit | CTAB     | PS kit |
| Archaea                 | 45      | 18     | 47       | 55     | 73       | 60     |
| Bacteria                | 55      | 82     | 53       | 45     | 27       | 40     |
| <b>Archaea</b>          |         |        |          |        |          |        |
| Crenarchaeota           | 0       | 0      | 0        | 4      | 0        | 0      |
| Euryarchaeota           | 65      | 48     | 68       | 59     | 92       | 90     |
| Thaumarchaeota          | 35      | 52     | 32       | 37     | 8        | 10     |
| <b>Bacteria</b>         |         |        |          |        |          |        |
| Acidobacteria           | 4.8     | 7.7    | 0.0      | 0.0    | 2.4      | 15.6   |
| Actinobacteria          | 14.3    | 20.7   | 6.7      | 26.6   | 1.5      | 22.2   |
| Chloroflexi             | 31.4    | 40.9   | 36.6     | 31.5   | 11.2     | 24.3   |
| Firmicutes              | 33.0    | 13.6   | 33.3     | 18.2   | 62.9     | 17.6   |
| Proteobacteria          | 5.8     | 4.2    | 6.2      | 7.0    | 11.9     | 4.6    |
| Verrucomicrobia         | 8.4     | 6.0    | 14.5     | 9.1    | 8.6      | 6.6    |
| Other                   | 2.3     | 6.8    | 2.7      | 7.6    | 1.6      | 9.2    |
| <b>Chloroflexi</b>      |         |        |          |        |          |        |
| AKIW781                 | 5.4     | 0.0    | 0.0      | 3.9    | 0.0      | 3.8    |
| Ktedonobacteraceae      | 61.9    | 88.2   | 72.9     | 46.4   | 69.6     | 58.4   |
| Thermobaculaceae        | 0.0     | 2.1    | 0.0      | 0.0    | 0.0      | 0.0    |
| Uncultured              | 32.7    | 9.7    | 27.1     | 49.7   | 30.4     | 37.8   |
| <b>Firmicutes</b>       |         |        |          |        |          |        |
| Bacillaceae             | 79.7    | 100.0  | 60.8     | 22.9   | 30.4     | 84.3   |
| Family XVII             | 0.0     | 0.0    | 3.2      | 28.1   | 0.0      | 0.0    |
| Paenibacillaceae        | 0.0     | 0.0    | 6.6      | 24.5   | 0.0      | 0.0    |
| Thermoanaerobacteraceae | 20.3    | 0.0    | 23.6     | 0.0    | 61.8     | 5.2    |
| TSAC18                  | 0.0     | 0.0    | 0.0      | 0.0    | 1.2      | 0.0    |
| TTA-B61                 | 0.0     | 0.0    | 0.0      | 0.0    | 1.0      | 0.0    |
| Uncultured              | 0.0     | 0.0    | 5.8      | 24.5   | 5.6      | 10.5   |
| <b>Proteobacteria</b>   |         |        |          |        |          |        |
| Burkholderiaceae        | 0.0     | 12.9   | 13.9     | 38.5   | 6.5      | 0.0    |
| Methylococcaceae        | 0.0     | 36.6   | 38.7     | 0.0    | 0.0      | 100.0  |
| Methylomonaceae         | 42.9    | 0.0    | 0.0      | 0.0    | 21.5     | 0.0    |
| Rhizobiaceae            | 8.3     | 12.9   | 20.2     | 23.0   | 18.7     | 0.0    |
| Sphingomonadaceae       | 48.8    | 37.6   | 0.0      | 38.5   | 16.1     | 0.0    |
| Xanthomonadaceae        | 0.0     | 0.0    | 27.2     | 0.0    | 37.1     | 0.0    |
| <b>Verrucomicrobia</b>  |         |        |          |        |          |        |
| Chthoniobacteraceae     | 14.7    | 19.2   | 8.4      | 18.8   | 0.0      | 58.2   |
| Methylacidiphilaceae    | 85.3    | 80.8   | 91.6     | 81.2   | 100.0    | 41.8   |
