# Supplementary material for: Geothermal Gases Shape the Microbial Community of the Volcanic Soil of Pantelleria, Italy
Source: PubMed Central journal article supplement (PMC7646524; doi:10.1128/msystems.00517-20), 2020-11-03
Supplement: mSystems.00517-20-st002.pdf [file mSystems.00517-20-st002.pdf]

**Table S2. List of HMM marker genes used for metagenomic analysis**

sulfide dehydrogenase [flavocytochrome c] flavoprotein chain (EC:1.8.2.3)  
cytochrome subunit of sulfide dehydrogenase  
sulfide:quinone oxidoreductase [EC:1.8.5.4]  
dissimilatory sulfite reductase alpha subunit [EC:1.8.99.5]  
dissimilatory sulfite reductase beta subunit [EC:1.8.99.5]  
anaerobic sulfite reductase subunit A  
anaerobic sulfite reductase subunit B  
anaerobic sulfite reductase subunit C  
sulfur oxygenase/reductase [EC:1.13.11.55]  
sulfur dioxygenase [EC:1.13.11.18]  
sulfur-oxidizing protein SoxA; L-cysteine S-thiosulfotransferase [EC:2.8.5.2]  
sulfur-oxidizing protein SoxB; S-sulfosulfanyl-L-cysteine sulfohydrolase [EC:3.1.6.20]  
sulfane dehydrogenase subunit SoxC;  
sulfur-oxidizing protein SoxY  
S-disulfanyl-L-cysteine oxidoreductase SoxD [EC:1.8.2.6]  
L-cysteine S-thiosulfotransferase [EC:2.8.5.2]  
sulfur-oxidizing protein SoxZ  
adenylylsulfate reductase, subunit A [EC:1.8.99.2]  
adenylylsulfate reductase, subunit B [EC:1.8.99.2]  
sulfate adenylyltransferase [EC:2.7.7.4]  
sulfate adenylyltransferase subunit 2 [EC:2.7.7.4]  
3'-phosphoadenosine 5'-phosphosulfate synthase [EC:2.7.7.4 2.7.1.25]  
adenylylsulfate kinase [EC:2.7.1.25]  
sulfate adenylyltransferase subunit 1 [EC:2.7.7.4]  
bifunctional enzyme CysN/CysC [EC:2.7.7.4 2.7.1.25]  
phosphoadenosine phosphosulfate reductase [EC:1.8.4.8 1.8.4.10]  
sulfite reductase (NADPH) flavoprotein alpha-component [EC:1.8.1.2]  
sulfite reductase (NADPH) hemoprotein beta-component [EC:1.8.1.2]  
sulfite reductase (ferredoxin) [EC:1.8.7.1]  
sulfur reductase molybdopterin subunit  
sulfur reductase FeS subunit  
sulfur reductase membrane anchor  
thiosulfate reductase / polysulfide reductase chain A [EC:1.8.5.5]  
thiosulfate reductase electron transport protein  
thiosulfate reductase cytochrome b subunit  
sulfite dehydrogenase (cytochrome C) [EC:1.8.2.1]  
sulfite dehydrogenase (cytochrome C) subunit B  
sulfite oxidase  
sulfite dehydrogenase (quinone) subunit SoeA  
sulfite dehydrogenase (quinone) subunit SoeB  
sulfite dehydrogenase (quinone) subunit SoeC

Fe-Fe hydrogenase Group A1  
Fe-Fe hydrogenase Group A2  
Fe-Fe hydrogenase Group A3  
Fe-Fe hydrogenase Group A4  
Fe-Fe hydrogenase Group B  
Fe-Fe hydrogenase Group C1  
Fe-Fe hydrogenase Group C2  
Fe-Fe hydrogenase Group C3  
Fe-Fe hydrogenase Group Fe

Ni-Fe hydrogenase Group 1a  
Ni-Fe hydrogenase Group 1b  
Ni-Fe hydrogenase Group 1c  
Ni-Fe hydrogenase Group 1d  
Ni-Fe hydrogenase Group 1e  
Ni-Fe hydrogenase Group 1f  
Ni-Fe hydrogenase Group 1g  
Ni-Fe hydrogenase Group 1h  
Ni-Fe hydrogenase Group 1i  
Ni-Fe hydrogenase Group 1j  
Ni-Fe hydrogenase Group 1k  
Ni-Fe hydrogenase Group 2a  
Ni-Fe hydrogenase Group 2b  
Ni-Fe hydrogenase Group 2c  
Ni-Fe hydrogenase Group 2d  
Ni-Fe hydrogenase Group 2e  
Ni-Fe hydrogenase Group 3a  
Ni-Fe hydrogenase Group 3b  
Ni-Fe hydrogenase Group 3c  
Ni-Fe hydrogenase Group 3d  
Ni-Fe hydrogenase Group 4a  
Ni-Fe hydrogenase Group 4b  
Ni-Fe hydrogenase Group 4c  
Ni-Fe hydrogenase Group 4d  
Ni-Fe hydrogenase Group 4e  
Ni-Fe hydrogenase Group 4f  
Ni-Fe hydrogenase Group 4g  
Ni-Fe hydrogenase Group 4h  
Ni-Fe hydrogenase Group 4i

methane/ammonia monooxygenase subunit A [EC:1.14.18.3 1.14.99.39]  
methane/ammonia monooxygenase subunit B  
methane/ammonia monooxygenase subunit C  
methane monooxygenase component A alpha chain  
methane monooxygenase component A beta chain  
methane monooxygenase component A gamma chain  
methane monooxygenase regulatory protein B  
methane monooxygenase component D  
methyl-coenzyme M reductase alpha subunit [EC:2.8.4.1]  
methyl-coenzyme M reductase beta subunit [EC:2.8.4.1]  
methyl-coenzyme M reductase gamma subunit [EC:2.8.4.1]  
methyl-coenzyme M reductase subunit C  
methane/ammonia monooxygenase subunit A [EC:1.14.18.3 1.14.99.39]  
nitrogenase iron-iron protein, alpha chain [EC:1.18.6.1]  
nitrogenase iron-iron protein, beta chain [EC:1.18.6.1]  
nitrogenase delta subunit [EC:1.18.6.1]  
nitrogenase molybdenum-iron protein alpha chain [EC:1.18.6.1]  
nitrogenase molybdenum-iron protein beta chain [EC:1.18.6.1]  
nitrogenase vanadium-iron protein, alpha chain [EC:1.18.6.1]  
nitrogenase vanadium-iron protein beta chain [EC:1.18.6.1]  
nitrogenase vanadium-iron protein delta chain [EC:1.18.6.1]  
nitrogenase iron protein NifH [EC:1.18.6.1]  
nitrate reductase / nitrite oxidoreductase, alpha subunit [EC:1.7.5.1 1.7.99.-]

nitrate reductase / nitrite oxidoreductase, beta subunit [EC:1.7.5.1 1.7.99.-]  
periplasmic nitrate reductase NapA [EC:1.7.99.-]  
nitrate reductase cytochrome c-type subunit  
nitrate reductase / nitrite oxidoreductase, alpha subunit [EC:1.7.5.1 1.7.99.-]  
nitrate reductase / nitrite oxidoreductase, beta subunit [EC:1.7.5.1 1.7.99.-]  
nitrate reductase gamma subunit  
nitrate reductase (NAD(P)H) [EC:1.7.1.1 1.7.1.2 1.7.1.3]  
ferredoxin-nitrate reductase [EC:1.7.7.2]  
assimilatory nitrate reductase catalytic subunit [EC:1.7.99.-]  
assimilatory nitrate reductase electron transfer subunit [EC:1.7.99.-]  
cytochrome c nitrite reductase small subunit  
ferredoxin-nitrite reductase [EC:1.7.7.1]  
nitrite reductase (cytochrome c-552) [EC:1.7.2.2]  
nitrite reductase (NAD(P)H) [EC:1.7.1.4]  
cytochrome c nitrite reductase, NrfD subunit [EC:1.7.2.2]  
nitrite reductase (NADH) large subunit [EC:1.7.1.15]  
nitrite reductase (NADH) small subunit [EC:1.7.1.15]  
nitrite reductase (NO-forming) [EC:1.7.2.1]  
nitrite reductase (NO-forming) / hydroxylamine reductase [EC:1.7.2.1 1.7.99.1]  
octaheme c-type cytochrome, tetrathionate reductase family [EC:1.7.2.2]  
nitric oxide reductase subunit B [EC:1.7.2.5]  
nitric oxide reductase subunit C  
nitrous-oxide reductase [EC:1.7.2.4]  
hydrazine oxidoreductase A hydroxylamine oxidoreductase hydrazine dehydrogenase [EC:1.7.2.8]  
hydrazine synthase subunit A [EC 1.7.2.7]  
hydrazine synthase subunit B [EC 1.7.2.7]  
hydrazine synthase subunit C [EC:1.7.2.7]  
hydroxylamine dehydrogenase [EC:1.7.2.6]  
urease subunit alpha [EC:3.5.1.5]  
urease subunit beta [EC:3.5.1.5]  
urease subunit gamma [EC:3.5.1.5]  
urease subunit beta/gamma [EC:3.5.1.5]  
urease [EC:3.5.1.5]  
cyanate lyase [EC:4.2.1.104]  
nitrile hydratase subunit alpha [EC:4.2.1.84]  
nitrile hydratase subunit beta [EC:4.2.1.84]

cytochrome c oxidase subunit I [EC:1.9.3.1]  
cytochrome c oxidase subunit I,coxAC; cytochrome c oxidase subunit I+III  
cytochrome c oxidase subunit II [EC:1.9.3.1]  
cytochrome c oxidase cbb3-type subunit I [EC:1.9.3.1]  
cytochrome c oxidase cbb3-type subunit II  
cytochrome c oxidase cbb3-type subunit III  
cytochrome o ubiquinol oxidase subunit II [EC:1.10.3.10]  
cytochrome o ubiquinol oxidase subunit IV  
heme o synthase [EC:2.5.1.141]  
cytochrome bd ubiquinol oxidase subunit I [EC:1.10.3.14]  
cytochrome bd ubiquinol oxidase subunit II [EC:1.10.3.14]  
cytochrome aa3-600 menaquinol oxidase subunit II [EC:1.10.3.12]  
cytochrome aa3-600 menaquinol oxidase subunit I [EC:1.10.3.12]  
cytochrome aa3-600 menaquinol oxidase subunit III,qoxC

PPQ-depenent methanol dehydrogenase [EC:1.1.2.7]

PPQ-depenent methanol dehydrogenase [EC:1.1.2.7]  
methanol dehydrogenase (cytochrome c) subunit 2  
methanol dehydrogenase [EC:1.1.1.244]  
NDMA-dependent methanol dehydrogenase EC 1.1.1.244  
alcohol oxidase [EC:1.1.3.13]  
methylamine dehydrogenase light chain [EC:1.4.9.1]  
methylamine dehydrogenase heavy chain [EC:1.4.9.1]  
[methyl-Co(III) methylamine-specific corrinoid protein]:coenzyme M methyltransferase [EC:2.1.1.247]  
[methyl-Co(III) methanol-specific corrinoid protein]:coenzyme M methyltransferase [ec:2.1.1.246]  
glutathione-independent formaldehyde dehydrogenase [EC:1.2.1.46]  
S-formylglutathione hydrolase [EC:3.1.2.12]  
S-(hydroxymethyl)glutathione dehydrogenase / alcohol dehydrogenase [EC:1.1.1.284 1.1.1.1]  
S-(hydroxymethyl)mycothiol dehydrogenase [EC:1.1.1.306]  
5,6,7,8-tetrahydromethanopterin hydro-lyase [EC:4.2.1.147]  
formylmethanofuran--tetrahydromethanopterin N-formyltransferase [EC:2.3.1.101]  
methenyltetrahydromethanopterin cyclohydrolase [EC:3.5.4.27]  
formate dehydrogenase [EC:1.17.1.9]  
formate dehydrogenase major subunit [EC:1.17.1.9]  
formate dehydrogenase beta subunit [EC:1.17.1.9]  
formate dehydrogenase iron-sulfur subunit  
formate dehydrogenase subunit gamma  
formate dehydrogenase subunit delta [EC:1.17.1.9]  
formate dehydrogenase (coenzyme F420) beta subunit [EC:1.17.98.3 1.8.98.6]  
formate dehydrogenase (coenzyme F420) alpha subunit [EC:1.17.98.3 1.8.98.6]  
formate dehydrogenase (NADP+) alpha subunit [EC:1.17.1.10]  
formate dehydrogenase (NADP+) beta subunit [EC:1.17.1.10]  
aerobic carbon-monoxide dehydrogenase small subunit [EC:1.2.5.3]  
aerobic carbon-monoxide dehydrogenase medium subunit [EC:1.2.5.3]  
aerobic carbon-monoxide dehydrogenase large subunit [EC:1.2.5.3]  
ribulose-bisphosphate carboxylase large chain [EC:4.1.1.39] Form I  
ribulose-bisphosphate carboxylase large chain [EC:4.1.1.39] Form II  
ribulose-bisphosphate carboxylase large chain [EC:4.1.1.39] Form II/III  
ribulose-bisphosphate carboxylase large chain [EC:4.1.1.39] Form III  
ribulose-bisphosphate carboxylase large chain [EC:4.1.1.39] Form IV  
ribulose-bisphosphate carboxylase small chain [EC:4.1.1.39]  
phosphoribulokinase [EC:2.7.1.19]  
acetyl-CoA synthase [EC:2.3.1.169]  
acetyl-CoA decarboxylase/synthase complex subunit beta [EC:2.3.1.-]  
acetyl-CoA decarboxylase/synthase complex subunit alpha [EC:1.2.7.4]  
acetyl-CoA decarboxylase/synthase complex subunit gamma [EC:2.1.1.245]  
acetyl-CoA decarboxylase/synthase complex subunit epsilon  
acetyl-CoA decarboxylase/synthase complex subunit delta [EC:2.1.1.245]  
anaerobic carbon-monoxide dehydrogenase catalytic subunit [EC:1.2.7.4]  
anaerobic carbon-monoxide dehydrogenase iron sulfur subunit  
glycine hydroxymethyltransferase [EC:2.1.2.1]  
malate-CoA ligase subunit beta [EC:6.2.1.9]  
malate-CoA ligase subunit alpha [EC:6.2.1.9]  
3-hexulose-6-phosphate synthase [EC:4.1.2.43]  
bifunctional enzyme Fae/Hps [EC:4.2.1.147 4.1.2.43]  
3-hexulose-6-phosphate synthase / 6-phospho-3-hexuloisomerase [EC:4.1.2.43 5.3.1.27]  
pyruvate ferredoxin oxidoreductase alpha subunit [EC:1.2.7.1]  
pyruvate ferredoxin oxidoreductase beta subunit [EC:1.2.7.1]  
pyruvate ferredoxin oxidoreductase delta subunit [EC:1.2.7.1]

pyruvate ferredoxin oxidoreductase gamma subunit [EC:1.2.7.1]  
pyruvate-ferredoxin/ferredoxin oxidoreductase [EC:1.2.7.1 1.2.7.-]  
methyl-CoA(S)-citramethyl-CoA lyase [ec:4.1.3.24,4.1.3.25]  
succinate semialdehyde reductase (NADPH) [EC:1.1.1.-]  
2-oxoglutarate/2-oxoacid ferredoxin oxidoreductase subunit alpha [EC:1.2.7.3 1.2.7.11]  
2-oxoglutarate/2-oxoacid ferredoxin oxidoreductase subunit beta [EC:1.2.7.3 1.2.7.11]  
2-oxoglutarate ferredoxin oxidoreductase subunit delta [EC:1.2.7.3]  
2-oxoglutarate ferredoxin oxidoreductase subunit gamma [EC:1.2.7.3]  
ATP-citrate lyase alpha-subunit [EC:2.3.3.8]  
ATP-citrate lyase beta-subunit [EC:2.3.3.8]

2-haloacid dehalogenase [EC:3.8.1.2]  
tetrachloroethene reductive dehalogenase catalytic subunit PceA [EC:1.21.99.5]  
DMSO reductase family type II enzyme, molybdopterin subunit / Perchlorate reductase subunit alpha (EC:1.97.1.-)  
selenate/chlorate reductase subunit alpha ; clrA, serA [EC:1.97.1.9 1.97.1.1]  
DMSO reductase family type II enzyme, iron-sulfur subunit / Perchlorate reductase subunit beta clrb, serB; selenate/chlorate reductase subunit beta [EC:1.97.1.9 1.97.1.1]  
serC, clrC; selenate/chlorate reductase subunit gamma [ec:1.97.1.9,1.97.1.1]  
chlorite dismutase [EC:1.13.11.49]  
arsenite oxidase small subunit [EC:1.20.2.1 1.20.9.1]  
arsenite oxidase large subunit [EC:1.20.2.1 1.20.9.1]  
arsenate reductase (glutaredoxin) [EC:1.20.4.1]  
arsenate reductase (thioredoxin) [EC:1.20.4.- 3.1.3.48]  
arsenate reductase, glutathione/glutaredoxin type  
putative selenate reductase FAD-binding subunit  
probable selenate reductase, molybdenum-binding subunit  
putative selenate reductase [EC:1.97.1.9]  
decaheme c-type cytochrome, OmcA/MtrC family  
decaheme-associated outer membrane protein, MtrB/PioB family
