# Supplementary material for: Geothermal Gases Shape the Microbial Community of the Volcanic Soil of Pantelleria, Italy
Source: PubMed Central journal article supplement (PMC7646524; doi:10.1128/msystems.00517-20), 2020-11-03
Supplement: mSystems.00517-20-st003.pdf [file mSystems.00517-20-st003.pdf]

**Supplementary Table S3: Accession numbers of MAGs.**

| <b>Number</b> | <b>Assembly accession</b> | <b>Taxonomy</b>           |
|---------------|---------------------------|---------------------------|
| 1             | GCA_902810565             | Methanocella conradii     |
| 2             | GCA_902806695             | Methylobacter sp.         |
| 3             | GCA_902810635             | Chloroflexi sp.           |
| 4             | GCA_902810765             | Dehalococcoidetes sp. B11 |
| 5             | GCA_902810725             | Verrucomicrobiaceae sp.   |
| 6             | GCA_902812485             | Uncultured Archaeon       |
| 7             | GCA_902810745             | Dehalococcoidetes sp.     |
| 8             | GCA_902810705             | Methylococcus sp.         |
| 9             | GCA_902810735             | Verrucomicrobiaceae sp.   |
| 10            | GCA_902810715             | Uncultured Bacterium      |
| 11            | GCA_902810755             | Dehalococcoidetes sp.     |
| 12            | GCA_902810695             | Rubrobacter sp.           |
| 13            | GCA_902812495             | Uncultured Bacterium      |
| 14            | GCA_902812345             | Chloroflexi sp.           |
| 15            | GCA_902812405             | Uncultured Bacterium      |
| 16            | GCA_902812445             | Methylococcus sp.         |
| 17            | GCA_902812365             | Acidobacterium sp.        |
| 18            | GCA_902812395             | Uncultured Bacterium      |
| 19            | GCA_902812415             | Acidobacterium sp.        |
| 20            | GCA_902812455             | Dehalococcoidetes sp.     |
| 21            | GCA_902812465             | Acidobacteria sp.         |
| 22            | GCA_902812335             | Chloroflexi sp.           |
| 23            | GCA_902812355             | Actinobacterium sp.       |
| 24            | GCA_902812475             | Actinobacterium sp.       |
| 25            | GCA_902812385             | Clostridia sp.            |
| 26            | GCA_902812505             | Uncultured Bacterium      |
| 27            | GCA_902812435             | Clostridia sp.            |
| 28            | GCA_902812425             | Rubrobacter sp.           |
| 29            | GCA_902812375             | Uncultured Bacterium      |
| 30            | GCA_902812875             | Clostridiales sp.         |
